# Supplementary material for: Use of absorption optical indices to assess seasonal variability of dissolved organic matter in amazon floodplain lakes
Source: Copernicus journal article supplement (doi:10.5194/bg-2019-324), 2019-10-01
Supplement: Supplementary file 1 [file bg-2019-324-supplement.pdf]

1 **Supplementary material**

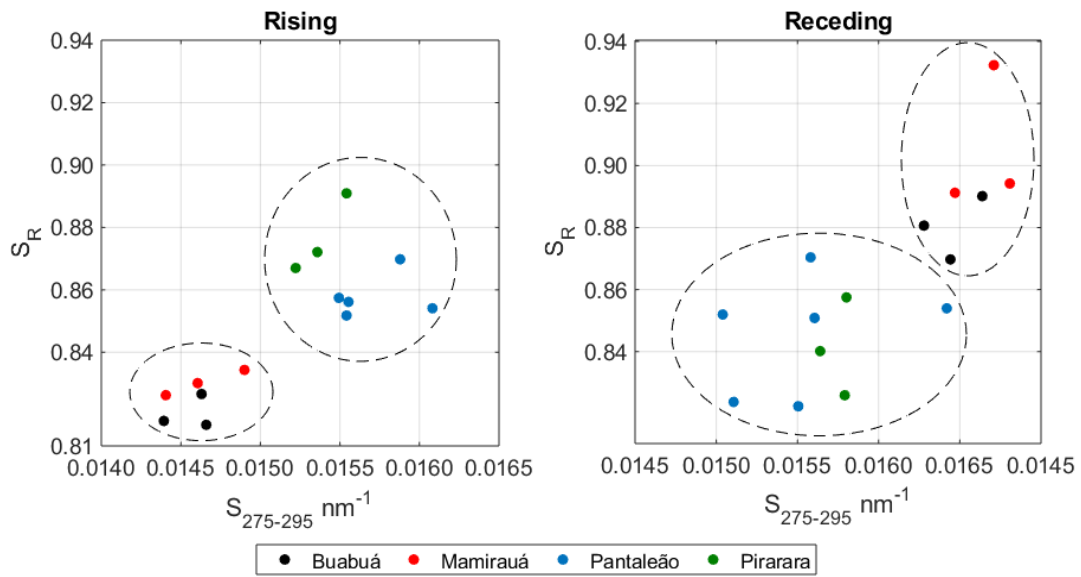

2

3 **S.1 – Scatter plot of average SR and S275-295 at each hydrograph phase (rising and receding) and in all lakes.**

4 **The dotted ellipsis represents the two groups identified.**

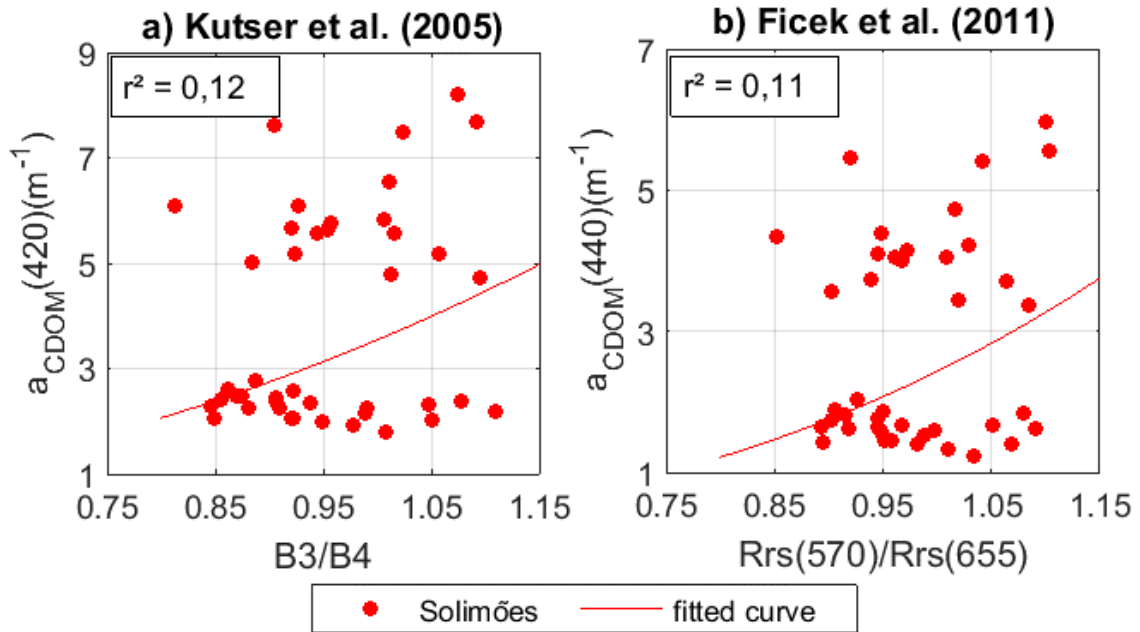

5

6 **S.2 - Regression between the band ratio proposed by KUTSER et al. (2005) and aCDOM (420) and b)**

7 **wavelength ratio proposed by FICEK et al. (2011) and aCDOM (440).**

8
